# Supplementary material for: The Discovery of New Antilisterial Proteins From Paenibacillus polymyxa Kp10 via Genome Mining and Mass Spectrometry
Source: PubMed Central journal article supplement (PMC7343975; doi:10.3389/fmicb.2020.00960), 2020-07-02
Supplement: Data_Sheet_1.pdf [file Data_Sheet_1.pdf]

1. Supplementary Data
2. Supplementary Figures and Tables
  - 2.1. Supplementary Figures

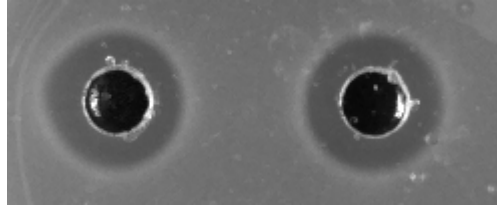

**Figure S1.** Inhibition zone obtained from agar well diffusion assay of the cell-free culture supernatant of an unidentified pure bacterial culture isolated from milk curd against *Listeria monocytogenes*

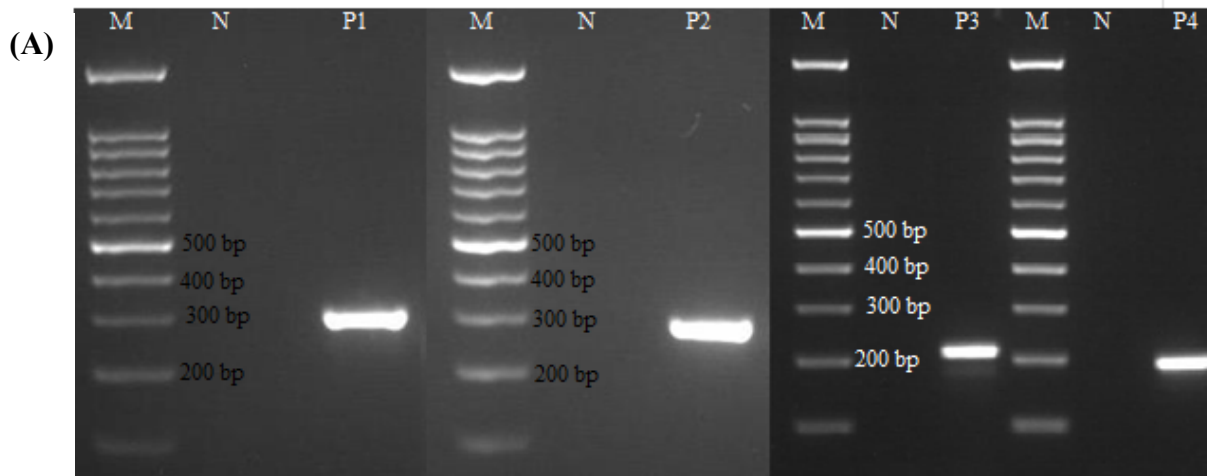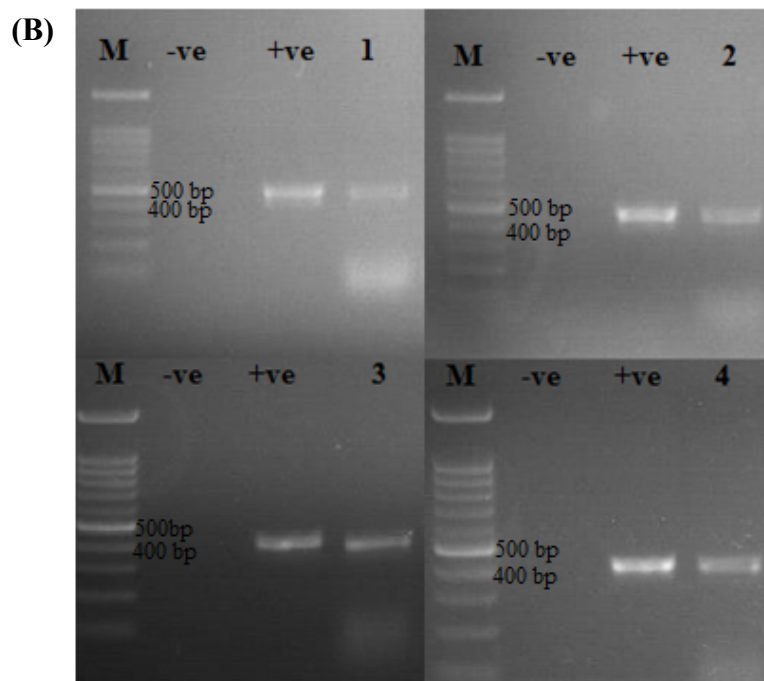

**Figure S2.** (A) PCR amplification of genes encode for P1, P2, P3 and P4. The amplicons were 305, 287, 213, and 195 bp in size, respectively. M: ExactMark 100 bp DNA ladder (Axil Scientific), P1, P2, P3, P4: Amplicon produced by PCR using P1, P2, P3 and P4 primers set, respectively, N: No template DNA in PCR. (B) Colony PCR of positive *E. coli* T7 Express LysY/Iq transformants (1) pET28b\_P1, (2) pET28b\_P2, (3) pET28b\_P3 and (4) pET28b\_P4. -ve: No PCR template; +ve: positive control (pET28b containing respective insert gene purified from *E. coli* NEB10); M: ExactMark 100 bp DNA Ladder, Ready-To-Use (BIO-5130)

## 2.2. Supplementary Tables

**Table S1.** Oligonucleotide sequence of primers used in this study. 27F and 1490R were used for amplification of partial 16S sequence; P1F-P1R were used for PCR amplification of putative antilisterial protein P1, P2F-P2R were used for PCR amplification of putative antilisterial protein P2, P3F-P3R were used for PCR amplification of putative antilisterial protein P3, P4F-P4R were used for PCR amplification of putative antilisterial protein P4, T7 Promoter Forward and T7 Terminator Reverse were used for colony PCR of positive transformants

| <b>Primer Set</b> | <b>Primer</b>            | <b>Nucleotide sequence (5' to 3')</b>            |
|-------------------|--------------------------|--------------------------------------------------|
| <b>16S</b>        | 27F                      | AGTTTGATCCTGGCTCAG                               |
|                   | 1490R                    | GTTACCTTGTTACGACTTC                              |
| <b>P1</b>         | P1F                      | CCATGGGCATGTTGAATAAAACGGATTTGATC                 |
|                   | P1R                      | GTCGACTTTAATTCCGTCTTTGAGCG                       |
| <b>P2</b>         | P2F                      | CCATGGGCATGAACAAGACAGATCTGATC                    |
|                   | P2R                      | CTCGAGTTTGTGTCATCGTCATCGTCGACGTTAACGGCTTCTTTAAGC |
| <b>P3</b>         | P3F                      | CCATGGGCATGAAGGCTAGTGAATTCCGCAAC                 |
|                   | P3R                      | GTCGACGCTAATCCCAAGTTCTCTTTCAC                    |
| <b>P4</b>         | P4F                      | CCATGGGCTTGGCCAAAGAAGATGTCATTGAGG                |
|                   | P4R                      | GTCGACCTTGCGGTACGTTATACGG                        |
| <b>Colony PCR</b> | T7 Promoter<br>Forward   | TAATACGACTCACTATAGG                              |
|                   | T7 Terminator<br>Reverse | GCTAGTTATTGCTCAGCGG                              |

**Table S2.** Biochemical characterizations of the *P. polymyxa* Kp10 for production of acetyl methyl carbinol, catalase, oxidase, indole and reduction of nitrate as compared to biochemical characteristics of other *Paenibacillus* species identified by other researchers. - Negative result; + Positive result; ND: Not determined

|                             | Acetyl methyl carbinol | Catalase | Oxidase | Nitrate reduction | Indole | Reference             |
|-----------------------------|------------------------|----------|---------|-------------------|--------|-----------------------|
| <i>P. larvae</i>            | -                      | -        | +       | +                 | +      | Hamdi et al., 2013    |
| <i>P. polymyxa</i> ATCC842T | +                      | +        | +       | +                 | +      | Hamdi et al., 2013    |
| <i>P. thiaminolyticus</i>   | -                      | +        | +       | -                 | -      | Guo et al., 2012      |
| <i>P. polymyxa</i> Kp10     | +                      | +        | -       | +                 | -      | This study            |
| <i>P. polymyxa</i> OSY-DF   | ND                     | +        | -       | +                 | -      | He et al., 2007       |
| <i>Paenibacillus</i> sp A3  | -                      | -        | -       | ND                | -      | Baindara et al., 2016 |

**Table S3.** *Paenibacillus polymyxa* Kp10 genome features

| Genome Feature                 | Value       |
|--------------------------------|-------------|
| Total length (bp)              | 5, 653, 475 |
| No of contigs                  | 122         |
| Contig N50 (bp)                | 619, 841    |
| Number of genes                | 5054        |
| Number of coding sequences     | 4808        |
| Number of RNA genes            | 124         |
| Number of other ncRNA features | 4           |
| G+C content (%)                | 45.47       |

**Table S4.** Potential antimicrobial peptides or proteins and their biosynthetic proteins identified in *Paenibacillus polymyxa* Kp10 draft genome sequence through bioinformatic analysis using BAGEL4<sup>a</sup>, antiSMASH<sup>b</sup> and CD-Search<sup>c</sup>. N/A: not applicable. N/D: not described

| No | Predicted antimicrobial peptides (Protein ID/locus tag)                  | Predicted biosynthetic proteins/locus tag | CD-Search                                                                                      | Putative function                                                                                     | Location (contig number) |
|----|--------------------------------------------------------------------------|-------------------------------------------|------------------------------------------------------------------------------------------------|-------------------------------------------------------------------------------------------------------|--------------------------|
| 1  | Lanthipeptide paenibacillin <sup>a,b</sup> (WP_080561132.1/ DBL67_20770) | LanP/DBL67_20765                          | Peptidase S8 family domain (cd07492) of peptidase domain in S8 and S53 superfamilies (cl10459) | Contains conserved Asp/His/Ser catalytic triad for proteolytic cleavage of the leader peptide         | Contig 12                |
|    |                                                                          | LanB/DBL67_20760                          | Lantibiotic dehydratase N-terminus family (pfam 04738)                                         | Catalyzes dehydration of serine and threonine residues through glutamylation process                  |                          |
|    |                                                                          |                                           | Thiopeptide-type bacteriocin biosynthesis domain (TIGR03891)                                   | Crucial for the final glutamate elimination step                                                      |                          |
|    |                                                                          | LanC/DBL67_20755                          | LanC domain-containing protein (cd04793) that encompasses:<br>(a) zinc-binding site (C C [HC]) | Enables metal binding that is crucial for activation of the thiol substrate for nucleophilic addition |                          |
|    |                                                                          |                                           | (b) active site (H C C [HC])                                                                   | Catalyzes thioether formation via addition of cysteine thiols to dehydrolanine and dehydrobutyrine    |                          |
|    |                                                                          | LanT/DBL67_20745                          | MdlB family domain (COG1132)                                                                   | ABC-type multidrug transport system for extracellular secretion of mature peptide                     |                          |
|    |                                                                          | LanI/DBL67_20750                          | Not found                                                                                      | N/A                                                                                                   |                          |
|    | LanN/DBL67_20720                                                         | TraX superfamily (cl05434)                | Amino terminal acetylation of mature peptide                                                   |                                                                                                       |                          |

|                  |                                                                                        |                                                                                                        |                                                                                                |                                                                                                       |          |
|------------------|----------------------------------------------------------------------------------------|--------------------------------------------------------------------------------------------------------|------------------------------------------------------------------------------------------------|-------------------------------------------------------------------------------------------------------|----------|
| 2                | Lanthipeptide<br>paenilan <sup>a,b</sup><br>(WP_019686785.<br>1/<br>DBL67_RS08735<br>) | LanB/DBL67_08715                                                                                       | Lantibiotic dehydratase N-terminus family (pfam 04738)                                         | Catalyzes dehydration of serine and threonine residues through glutamylation process                  | Contig 3 |
|                  |                                                                                        |                                                                                                        | Thiopeptide-type bacteriocin biosynthesis domain (TIGR03891)                                   | Crucial for the final glutamate elimination step                                                      |          |
|                  |                                                                                        | LanC1/DBL67_08725                                                                                      | LanC domain-containing protein (cd04793) that encompasses:<br>(a) zinc-binding site (C C [HC]) | Enables metal binding that is crucial for activation of the thiol substrate for nucleophilic addition |          |
|                  |                                                                                        |                                                                                                        | (b) active site (H C C [HC])                                                                   | Catalyzes thioether formation via addition of cysteine thiols to dehydrolanine and dehydrobutyrine    |          |
|                  |                                                                                        | LanC2/DBL67_08735                                                                                      | LanC domain-containing protein (cd04793) that encompasses:<br>(a) zinc-binding site (C C [HC]) | Enables metal binding that is crucial for activation of the thiol substrate for nucleophilic addition |          |
|                  |                                                                                        |                                                                                                        | (b) active site (H C C [HC])                                                                   | Catalyzes thioether formation via addition of cysteine thiols to dehydrolanine and dehydrobutyrine    |          |
|                  |                                                                                        | LanE/DBL67_08745                                                                                       | lantibiotic-exporting membrane permease, EfiE/EfiG/ABC2 family (COG4200).                      | ABC-type multidrug transport system and ATPase components that are crucial for defense mechanisms     |          |
|                  |                                                                                        | LanF/DBL67_08750                                                                                       | ccm domain (COG1131)                                                                           |                                                                                                       |          |
| LanG/DBL67_08740 | lantibiotic-exporting membrane permease, EfiE/EfiG/ABC2 family (COG4200).              |                                                                                                        |                                                                                                |                                                                                                       |          |
| LanT/DBL67_08710 | MdlB family domain (COG1132)                                                           | ATP binding cassette-type multidrug transport system for extracellular secretion of the mature peptide |                                                                                                |                                                                                                       |          |

|   |                                                                    |                   |                                                                                                                                                           |                                                                                                    |          |
|---|--------------------------------------------------------------------|-------------------|-----------------------------------------------------------------------------------------------------------------------------------------------------------|----------------------------------------------------------------------------------------------------|----------|
|   |                                                                    | LanK/DBL67_08755  | Signal transduction histidine kinase (COG0642)                                                                                                            | Functions as a protein kinase that phosphorylates a target protein in response to various signals. |          |
| 3 | Lasso peptide paeninodin <sup>b</sup> (WP_013369856.1/DBL67_10215) | LanB1/DBL67_10205 | Coenzyme Pqq synthesis protein D family domain (pfam05402)                                                                                                | Binds to precursor peptide and directs it to LanB2                                                 | Contig 3 |
|   |                                                                    | LanB2/DBL67_10200 | Transglutaminase-like domain (pfam13471)                                                                                                                  | Protease activity for removal of leader peptide                                                    |          |
|   |                                                                    | LanC/DBL67_10220  | Glutamine amidotransferases class-II (GATase) asparagine synthase B (cd00712) of glucosamine 6-phosphate synthetase superfamily (cl28298)                 | For the formation of the Gly1-Glu8 amide bond that assists macrolactam ring formation              |          |
|   |                                                                    | LanK/DBL67_10210  | Phosphoenolpyruvate carboxykinase superfamily (cl22860)<br>Nucleoside/nucleotide kinase (NK) superfamily (cl17190)                                        | Phosphorylates paeninodin precursor peptides at its C-terminal serine residue                      |          |
|   |                                                                    | LanD/DBL67_10190  | MdlB domain                                                                                                                                               | ABC-type multidrug transport system                                                                |          |
|   |                                                                    | LanNT/DBL67_10195 | Uncharacterized nucleotidyltransferase (pfam14907) of nucleotidyltransferase (NT) domain of DNA polymerase beta and similar protein superfamily (cl11966) | N/D                                                                                                |          |
|   |                                                                    | LanST/DBL67_10225 | Sulfotransferase family (pfam13469)                                                                                                                       | Catalyzes the transfer of sulfate from a donor to an acceptor                                      |          |

|   |                                                                            |                                                           |                                                                                                                                                                                                              |                                                                                                                                                                                                                                                                                                                                                                                                                                                                                                              |          |
|---|----------------------------------------------------------------------------|-----------------------------------------------------------|--------------------------------------------------------------------------------------------------------------------------------------------------------------------------------------------------------------|--------------------------------------------------------------------------------------------------------------------------------------------------------------------------------------------------------------------------------------------------------------------------------------------------------------------------------------------------------------------------------------------------------------------------------------------------------------------------------------------------------------|----------|
| 4 | <i>Sacti5/Sactipeptide<sup>a</sup></i><br>(WP_080561119.1<br>/DBL67_15195) | Radical SAM<br>/DBL67_15200                               | PRK13758 superfamily (cl28173)<br>Cys-rich peptide radical SAM<br>maturase CcpM<br><br>Members of this family are radical<br>SAM enzymes that occur next to<br>clostridial Cys-rich predicted<br>bacteriocin | Radical SAM enzyme<br>catalyzes reductive cleavage<br>of SAM and producing 5-<br>deoxyadenosyl radical. The 5-<br>deoxyadenosyl radical<br>catalyzes removal of<br>hydrogen atom of the $\alpha$ -<br>carbon of the acceptor amino<br>acid. Intramolecular attack<br>and transfer of electron to the<br>previously deprotonated<br>cysteine residue of the<br>precursor peptide catalyze the<br>formation of thioether bridge<br>between the $\alpha$ -carbon and the<br>sulfur group of cysteine<br>residue | Contig 5 |
|   |                                                                            | Peptide maturation<br>system<br>protein/DBL67_152<br>05   | nat-prod-clost family (TIGR04066)<br>of P-loop NTPase superfamily                                                                                                                                            | As H <sup>+</sup> -transporting two-sector<br>ATPase and postulated to<br>involve in bacteriocin<br>maturation or immunity                                                                                                                                                                                                                                                                                                                                                                                   |          |
|   |                                                                            | Acyl-carrier related<br>protein/DBL67_152<br>10           | ocin-ACP-rel family (TIGR04069)                                                                                                                                                                              | Proposed putative function in<br>biosynthesis of fatty acids and<br>polyketides                                                                                                                                                                                                                                                                                                                                                                                                                              |          |
|   |                                                                            | Serine<br>protease/DBL67_15<br>220                        | Peptidase S8 family domain<br>(cd07492) of peptidase domain in<br>S8 and S53 superfamilies (cl10459)                                                                                                         | Contains conserved<br>Asp/His/Ser catalytic triad for<br>proteolytic cleavage of the<br>leader peptide                                                                                                                                                                                                                                                                                                                                                                                                       |          |
|   |                                                                            | ABC transporter<br>ATP binding<br>protein/DBL67_151<br>90 | MdlB family domain (COG1132)<br>ABC-type multidrug transport<br>system, ATPase and permease<br>component                                                                                                     | Defense mechanism and<br>extracellular secretion of the<br>mature peptide                                                                                                                                                                                                                                                                                                                                                                                                                                    |          |



|   |                                                                   |                                                    |                                                                                                                                                                                                                                                                                                                                                                                                                                                                                                                                                                                                                        |                                                                                                                                                                                                                                                                 |           |
|---|-------------------------------------------------------------------|----------------------------------------------------|------------------------------------------------------------------------------------------------------------------------------------------------------------------------------------------------------------------------------------------------------------------------------------------------------------------------------------------------------------------------------------------------------------------------------------------------------------------------------------------------------------------------------------------------------------------------------------------------------------------------|-----------------------------------------------------------------------------------------------------------------------------------------------------------------------------------------------------------------------------------------------------------------|-----------|
| 5 | <i>Sacti10/Sactipeptide</i> <sup>a</sup><br>(Not being annotated) | Anaerobic sulfatase maturase/DBL67_19425           | Specific hit to PRK13758 superfamily (cl28173). Non-specific hit to TIGR04334 (PSSMID 213947) radical SAM/SPASM domain Clo7bot peptide maturase; In multiple strains of <i>Clostridium botulinum</i> , this single radical SAM domain protein occurs next to a tandem array of seven homologous Cys-rich small peptides (see TIGR04333). Because this radical SAM enzyme contains the SPASM domain, associated with peptide modification, it is proposed to modify all seven <i>C. botulinum</i> targets, hence named as Clo7bot for this system. Suggested gene symbol is ctpM (Clostridial Tandem Peptide Maturase). | Proposed function in protein modification and repair<br><br>Catalyzes thioether linkage between $\beta$ -carbon and the sulphur group of cysteine residue                                                                                                       | Contig 10 |
|   |                                                                   | ABC transporter ATP-binding protein /DBL67_RS19420 | ABC-type multidrug transport system, ATPase and permease component (COG1132)                                                                                                                                                                                                                                                                                                                                                                                                                                                                                                                                           | Extracellular secretion of mature peptide                                                                                                                                                                                                                       |           |
|   |                                                                   | Radical SAM /DBL67_19415                           | Non-specific hit to Cys-rich peptide radical SAM maturase CcpM (TIGR04068) of PRK13758 superfamily (cl28173)<br><br>Members of this family are radical SAM enzymes that occur next to clostridial Cys-rich predicted bacteriocin                                                                                                                                                                                                                                                                                                                                                                                       | Defense mechanism<br><br>Radical SAM enzyme catalyzes reductive cleavage of SAM and producing 5-deoxyadenosyl radical. The 5-deoxyadenosyl radical catalyzes removal of hydrogen atom of the $\alpha$ -carbon of the acceptor amino acid. Intramolecular attack |           |

|   |                                                                                  |                                                                                                                          |                                                                                                                                                                                                                      |           |
|---|----------------------------------------------------------------------------------|--------------------------------------------------------------------------------------------------------------------------|----------------------------------------------------------------------------------------------------------------------------------------------------------------------------------------------------------------------|-----------|
|   |                                                                                  |                                                                                                                          | and transfer of electron to the previously deprotonated cysteine residue of the precursor peptide catalyze the formation of thioether bridge between the $\alpha$ -carbon and the sulphur group of cysteine residue. |           |
| 6 | Thiazole/oxazole-modified microcins <sup>b</sup><br>(PTU47115.1/<br>DBL67_10885) | Nitrile hydratase leader peptide (NHLP) domain family (TIGR03793) of TOMM_pelo super family (cl22942)                    | It is conserved among thiazole/oxazole-modified microcins (TOMMs) precursor<br><br>The domain is crucial for cleavage or extracellular secretion of the mature peptide                                               | Contig 3  |
| 7 | Histone-like DNA binding protein HU <sup>c</sup> (PTU44600.1/<br>DBL67_22290)    | Histone-like DNA-binding protein HU (cd13831) of HU-IHF superfamily (cl00257)<br>Contains two conserved sites which are: | Binds non-specifically to duplex DNA with a preference to nicked and bent DNA                                                                                                                                        | Contig 15 |
| 8 | Histone-like DNA binding protein HU <sup>c</sup> (PTU48889.1/<br>DBL67_03415)    | (1) dimer interface for polypeptide binding site<br>(2) DNA binding site for nucleic acid binding site                   |                                                                                                                                                                                                                      | Contig 1  |

**Table S5.** Recovery of antilisterial proteins obtained in each purification steps. AU is defined as the unit area of inhibition zone per unit volume of sample loaded into the well (mm<sup>2</sup>/mL)

|                                                             | <b>Volume<br/>(mL)</b> | <b>Total<br/>protein<br/>(mg)</b> | <b>Total activity<br/>(AU)</b> | <b>Specific activity<br/>(AU/mg)</b> | <b>Fold purification<br/>(per step)</b> | <b>Yield (%)<br/>per step</b> |
|-------------------------------------------------------------|------------------------|-----------------------------------|--------------------------------|--------------------------------------|-----------------------------------------|-------------------------------|
| <b>Cell-free culture<br/>supernatant</b>                    | 150                    | 10.64±1.30                        | 2.98 x 10 <sup>5</sup> ± 0     | 2.80x10 <sup>4</sup> ±3451           | 1.00                                    | 100.00                        |
| <b>Ammonium sulphate<br/>precipitation</b>                  | 50                     | 14.29±1.15                        | 2.31 x10 <sup>5</sup> ± 0      | 1.62 x10 <sup>4</sup> ±1305.2        | 0.58                                    | 77.60                         |
| <b>Amicon Ultra Centrifugal<br/>Device 10 kDa and 3 kDa</b> | 15                     | 13.53±2.39                        | 6.94 x10 <sup>4</sup> ± 0      | 5.13 x10 <sup>3</sup> ±1010.8        | 0.18                                    | 30.00                         |
| <b>Cation exchange<br/>chromatography</b>                   | 4                      | 1.04±0.13                         | 2.18 x10 <sup>4</sup> ± 0      | 2.09 x10 <sup>4</sup> ±2466.9        | 4.07                                    | 31.38                         |
